# Supplementary material for: Supramolecular activation in triggered cascade inversion
Source: Royal Society of Chemistry journal article supplement (doi:10.1039/b717301f), 2008-01-01

## Supporting information for:

### Supramolecular Activation in Triggered Cascade Inversion

*Hai Dong, Zhichao Pei, and Olof Ramström\**

Royal Institute of Technology, Department of Chemistry, Teknikringen 30  
S-10044 Stockholm, Sweden

#### NMR-analyses of cascade reaction and H-bond formation

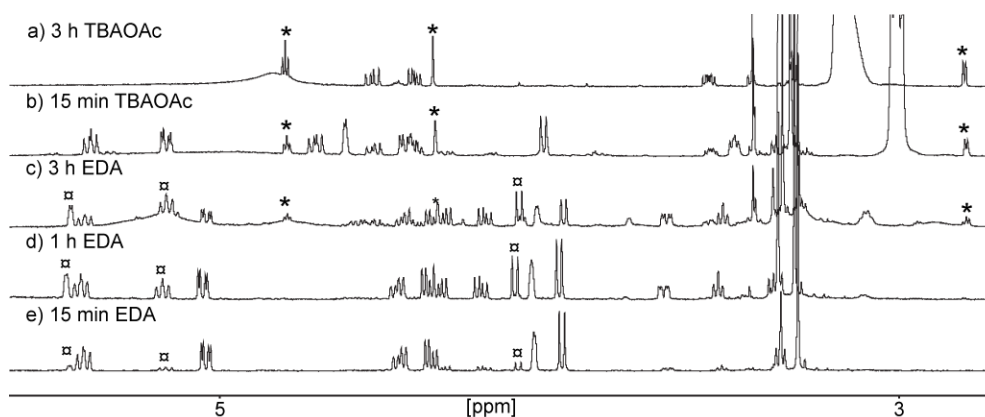

**Fig. 1** Cascade reaction with 5 eq. TBAOAc (a-b) or EDA (c-e). \* and ◻ indicate resonances from compound **4**, and **5**, respectively.

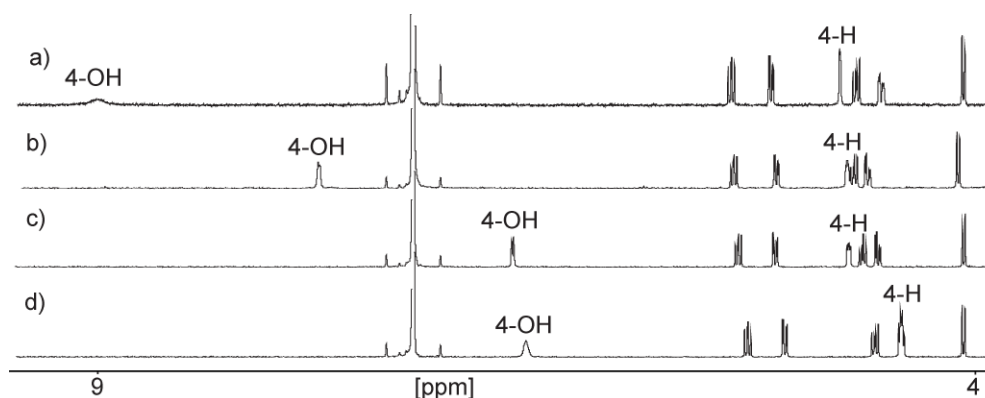

**Fig. 2** H-bond formation between the 4-OH group of compound **2** and tested anionic reagents (5 eq.); a: TBANO<sub>2</sub>; b: TBACl; c: TBABr; d: TBASCN.  $\delta_{4\text{-OH}}$  for compound **2** alone: 1.8.

**General triggered cascade carbohydrate epimerization procedure.** To a solution of compound **1** or **2** (140 mg, 0.5 mmol), in CH<sub>2</sub>Cl<sub>2</sub> (5 mL) was added pyridine (0.53 mL) at -20 °C. Trifluoromethanesulfonic anhydride (420 mg, 1.5 mmol) in CH<sub>2</sub>Cl<sub>2</sub> (2 mL) was added dropwise, and the mixture was stirred while allowing to warm from -20 °C to 10 °C over 2 h. The resulting mixture was subsequently diluted with CH<sub>2</sub>Cl<sub>2</sub> and washed with 1 M HCl, aqueous NaHCO<sub>3</sub>, water, and brine. The organic phase was dried over Na<sub>2</sub>SO<sub>4</sub> and concentrated in vacuo at low temperature. The residue was used directly in the next step without further purification. TBANO<sub>2</sub> (720 mg, 2.5 mmol) and ethylenediamine (0.167 mL, 2.5 mmol) were added to a solution of the protected triflate residue in dry toluene or acetonitrile (5.0 mL), and then allowed to react at room temperature for 4 h. The resulting mixture was directly purified by flash column chromatography (2:1 hexane–ethyl acetate), yielding **7** or **8** as a colorless syrup.

**Compound 7:** Yield: 117 mg, 0.45 mmol, 90%; <sup>1</sup>H NMR (CDCl<sub>3</sub>, 500 MHz): δ = 4.94 (d, 1 H, J<sub>4,5</sub> = 8.1 Hz, H<sub>4</sub>), 4.89 (s, 1 H, H<sub>1</sub>), 4.1–4.2 (m, 2 H, H<sub>6</sub>), 3.6–3.7 (m, 1 H, H<sub>5</sub>), 3.56 (s, 3 H, OMe), 3.2–3.3 (m, 2 H, H<sub>2</sub>, H<sub>3</sub>), 2.11 (d, 3 H, OAc), 2.07 (d, 3 H, OAc); <sup>13</sup>C NMR (CDCl<sub>3</sub> 125 MHz): δ = 170.93, 169.80, 98.32, 73.35, 63.54, 63.49, 56.9, 53.42, 50.15, 21.01, 20.97; MS (M+Na): 283.0794. Observed: 283.0791.

**Compound 8:** Yield: 109 mg, 0.42 mmol, 84%; <sup>1</sup>H NMR (CDCl<sub>3</sub>, 500 MHz): δ = 4.99 (d, 1 H, J<sub>4,3</sub> = 4.1 Hz, H<sub>4</sub>), 4.78 (s, 1 H, H<sub>1</sub>), 4.28 (dd, 1 H, J<sub>6a,5</sub> = 6.9 Hz, J<sub>6a,6b</sub> = 11.6 Hz, H<sub>6a</sub>), 4.22 (dd, 1 H, J<sub>6b,5</sub> = 5.6 Hz, H<sub>6b</sub>), 3.75–3.85 (m, 1 H, H<sub>5</sub>), 3.65 (dd, 1 H, J<sub>3,2</sub> = 3.8 Hz, H<sub>3</sub>), 3.6 (s, 3 H, OMe), 3.3 (d, 1 H, H<sub>2</sub>), 2.15 (d, 3 H, OAc), 2.05 (d, 3 H, OAc); <sup>13</sup>C NMR (CDCl<sub>3</sub> 125 MHz): δ = 170.81, 170.78, 98.67, 72.66, 64.59, 62.19, 56.99, 51.38, 51.21, 20.94, 20.85; MS (M+Na): 283.0794. Observed: 283.0786.

$^1\text{H}$ -NMR of **7** ( $\text{CDCl}_3$ )

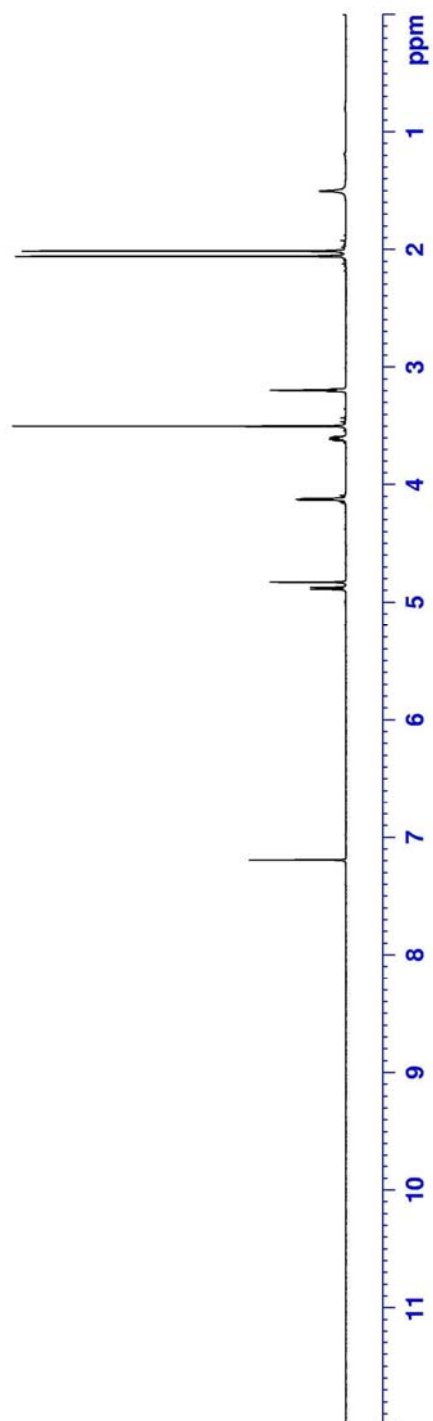

$^{13}\text{C}$ -NMR of **7** ( $\text{CDCl}_3$ )

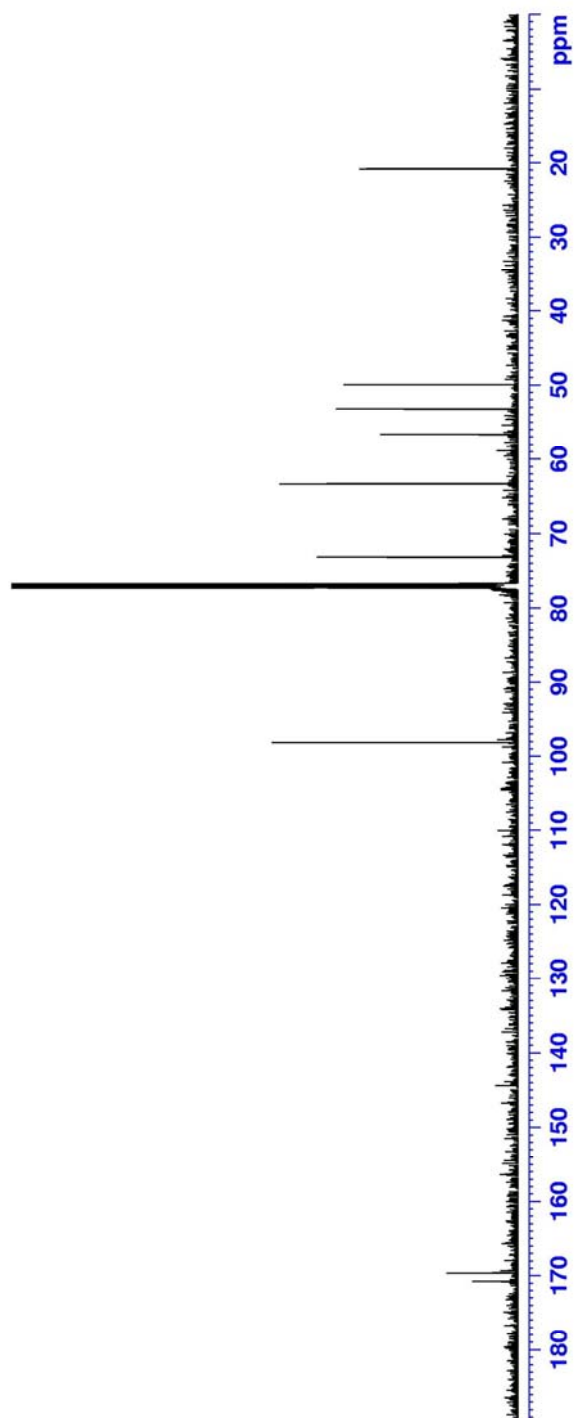

$^1\text{H}$ -NMR of **8** ( $\text{CDCl}_3$ )

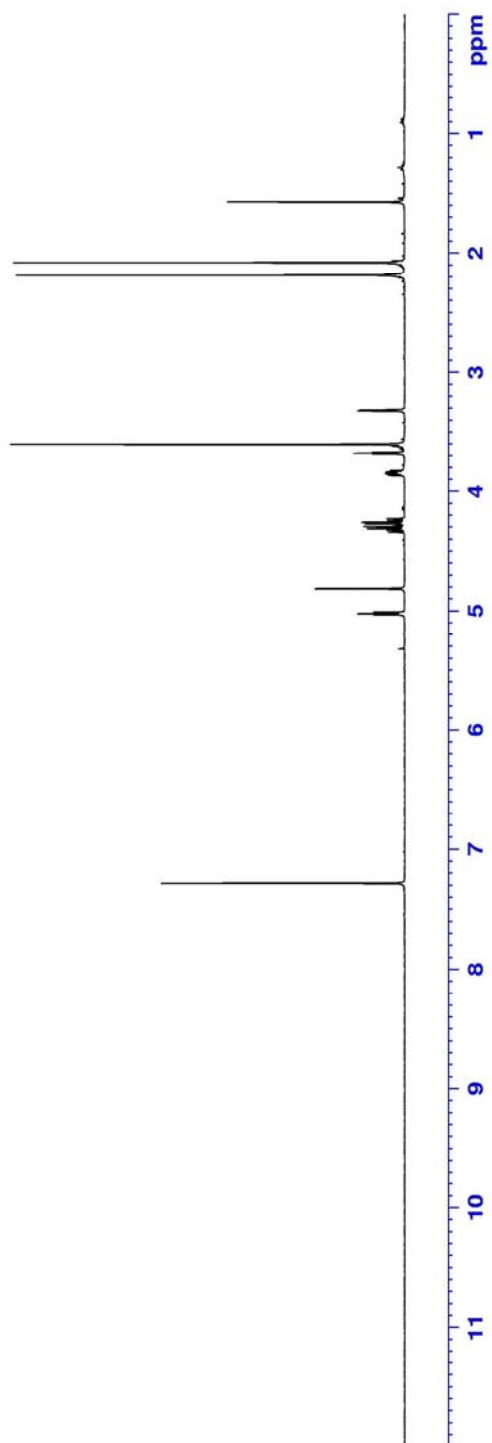

$^{13}\text{C}$ -NMR of **8** ( $\text{CDCl}_3$ )

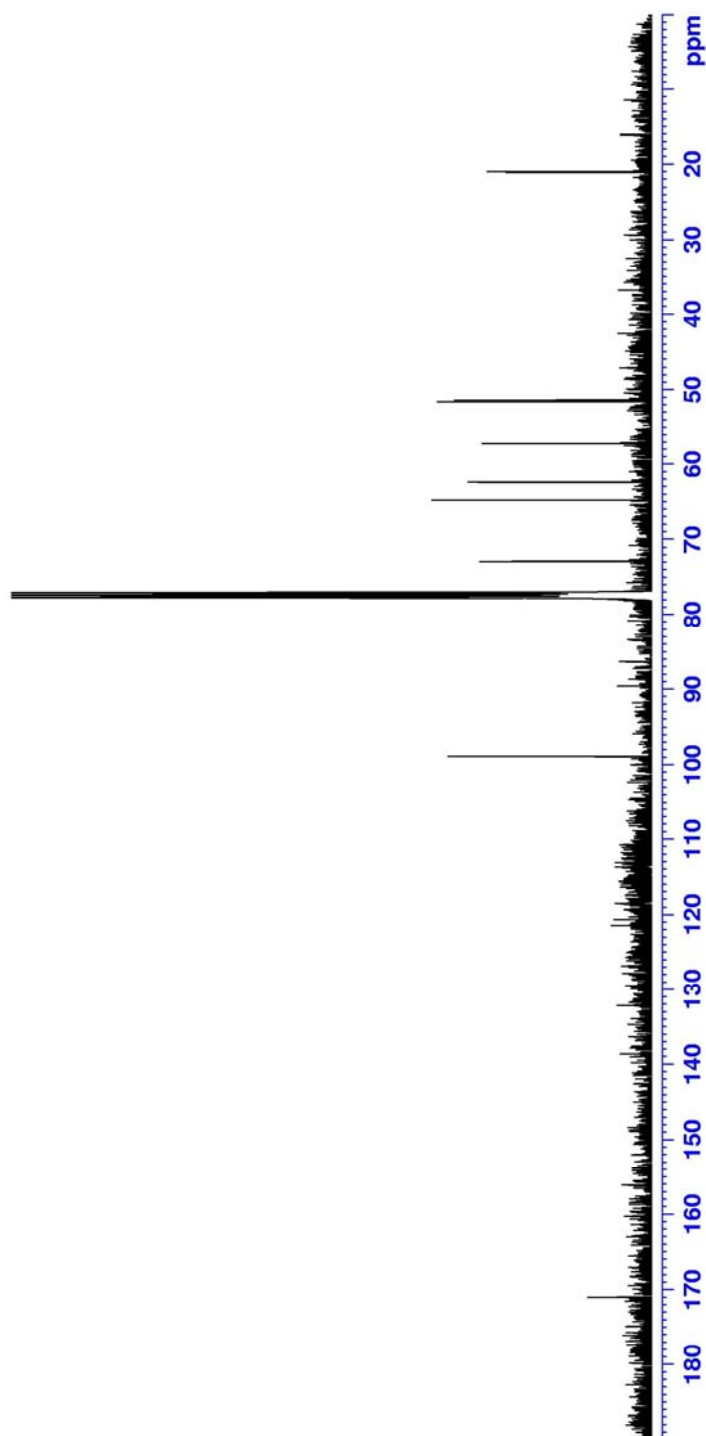

$^1\text{H}$ -NMR of **6** ( $\text{C}_6\text{D}_6$ )

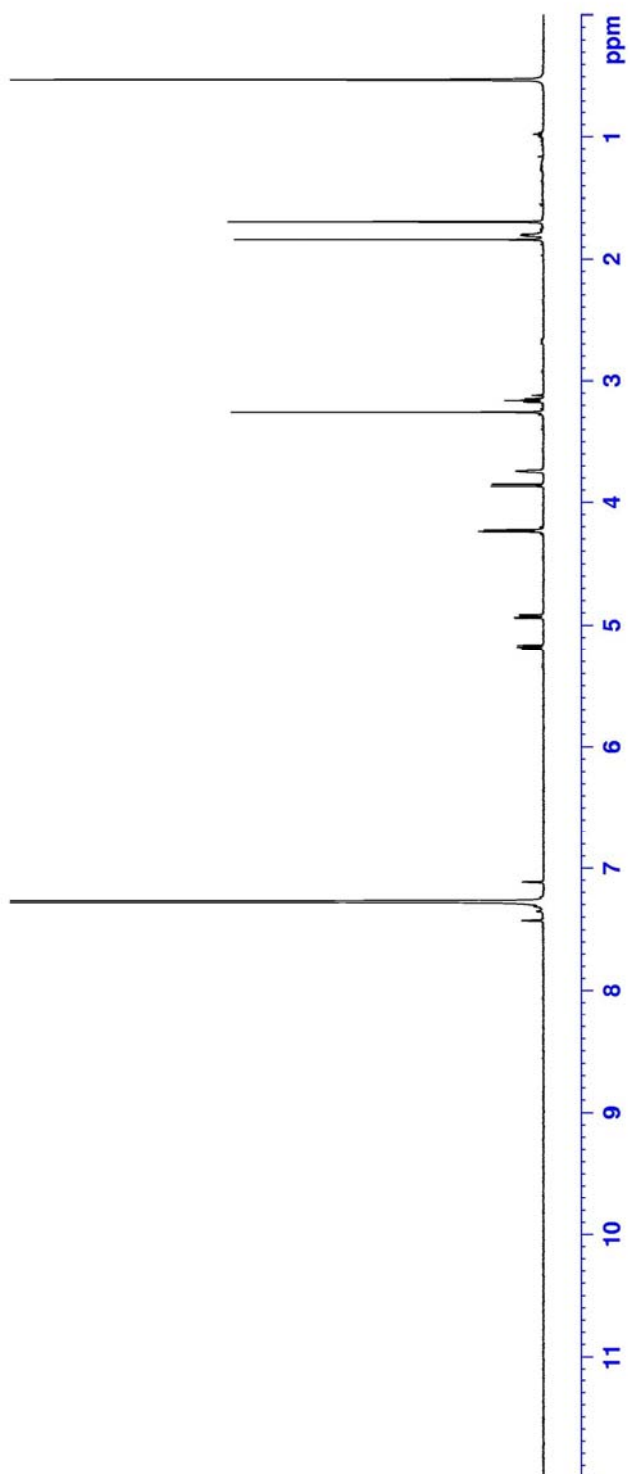

$^1\text{H}$ -H COSY of **6**

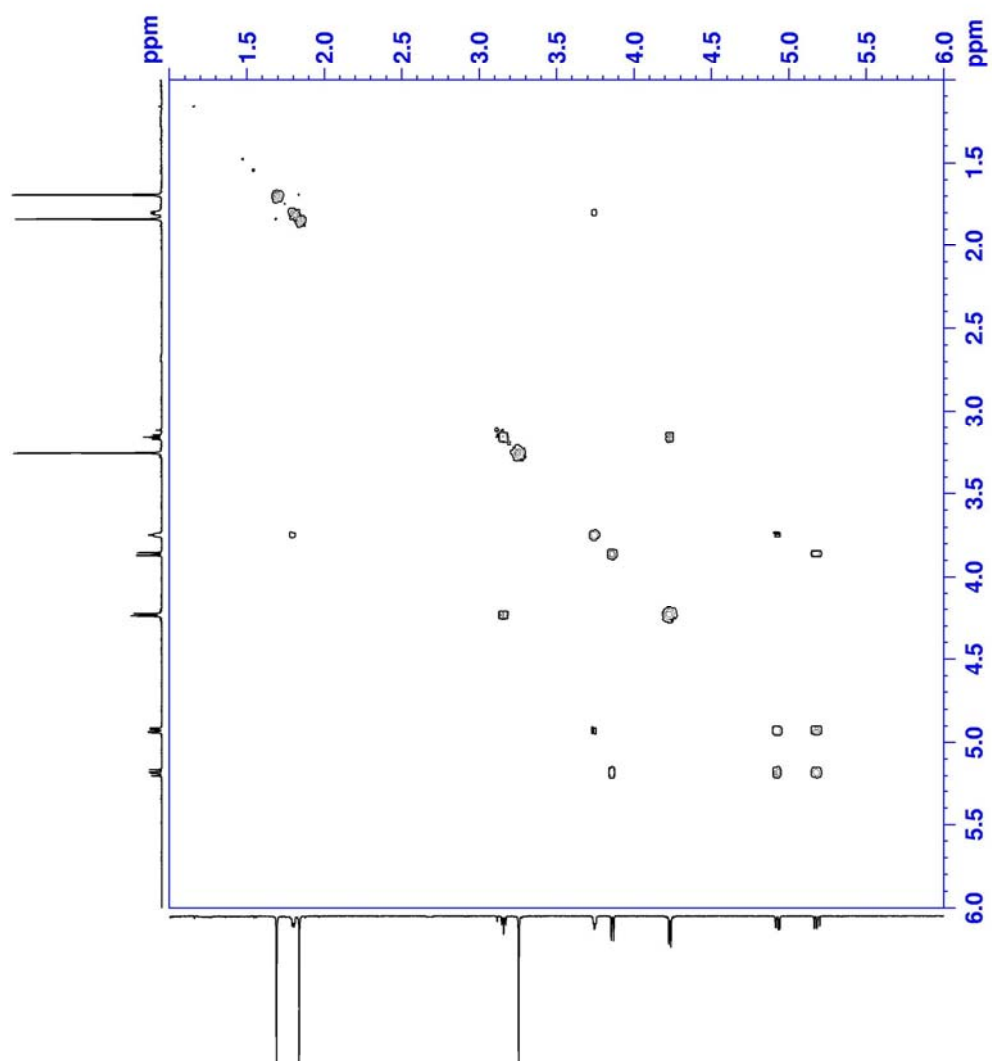



$^1\text{H}$ -NMR of **6** with  $\text{TBANO}_2$

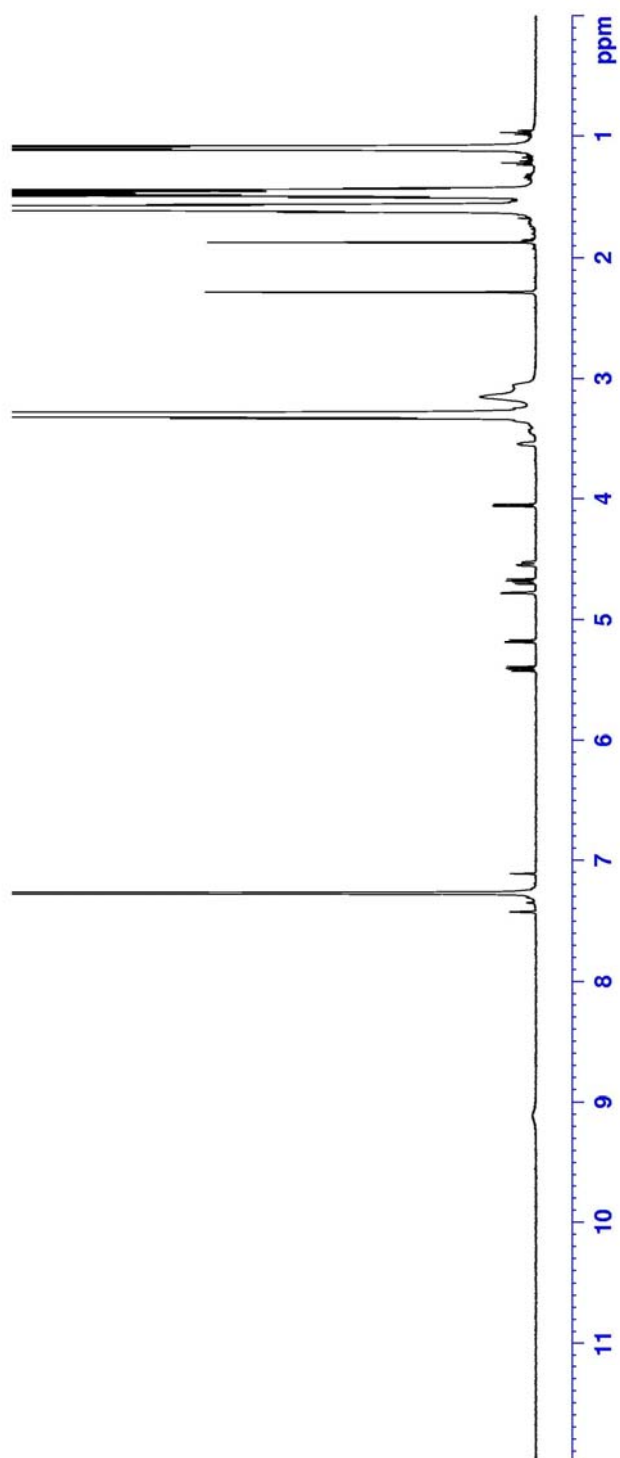

$^1\text{H}$ -H COSY of **6** with TBANO<sub>2</sub>

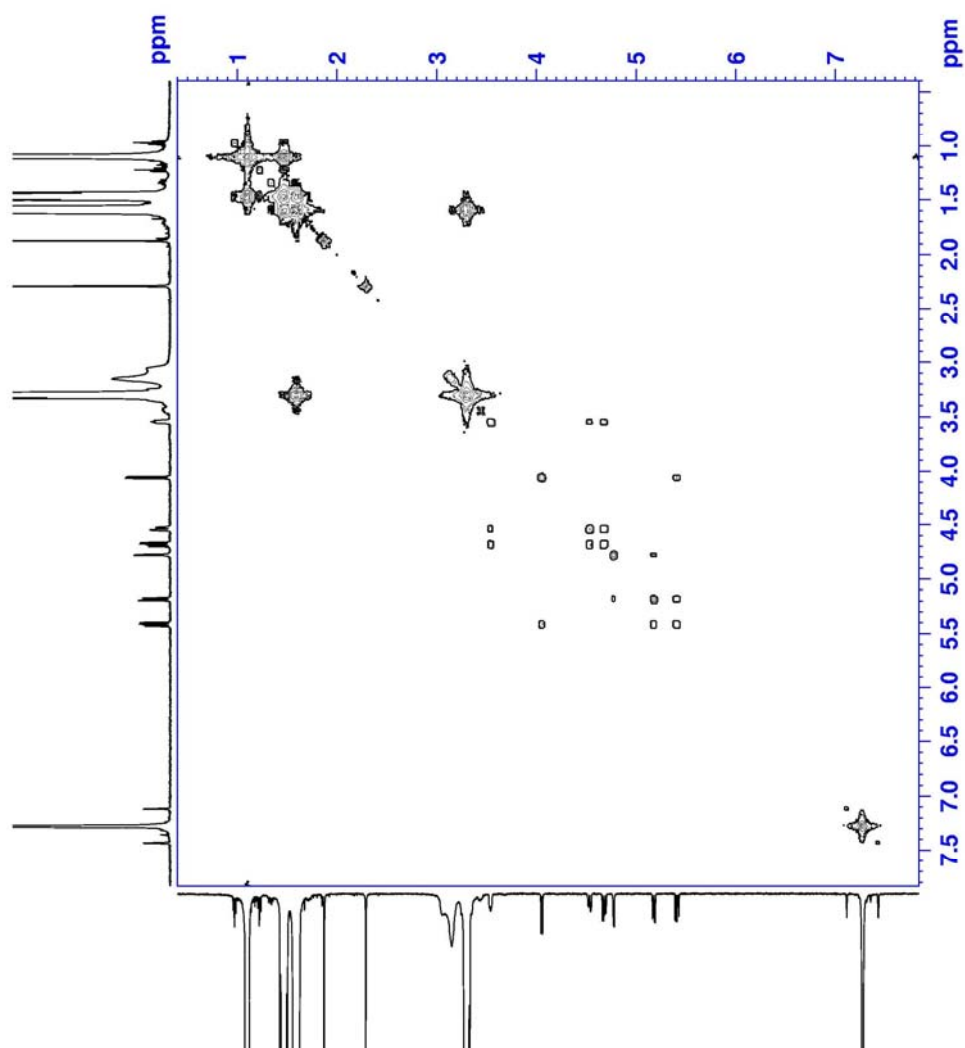

$^1\text{H}$ -NMR of **6** with  $\text{TBANO}_2$

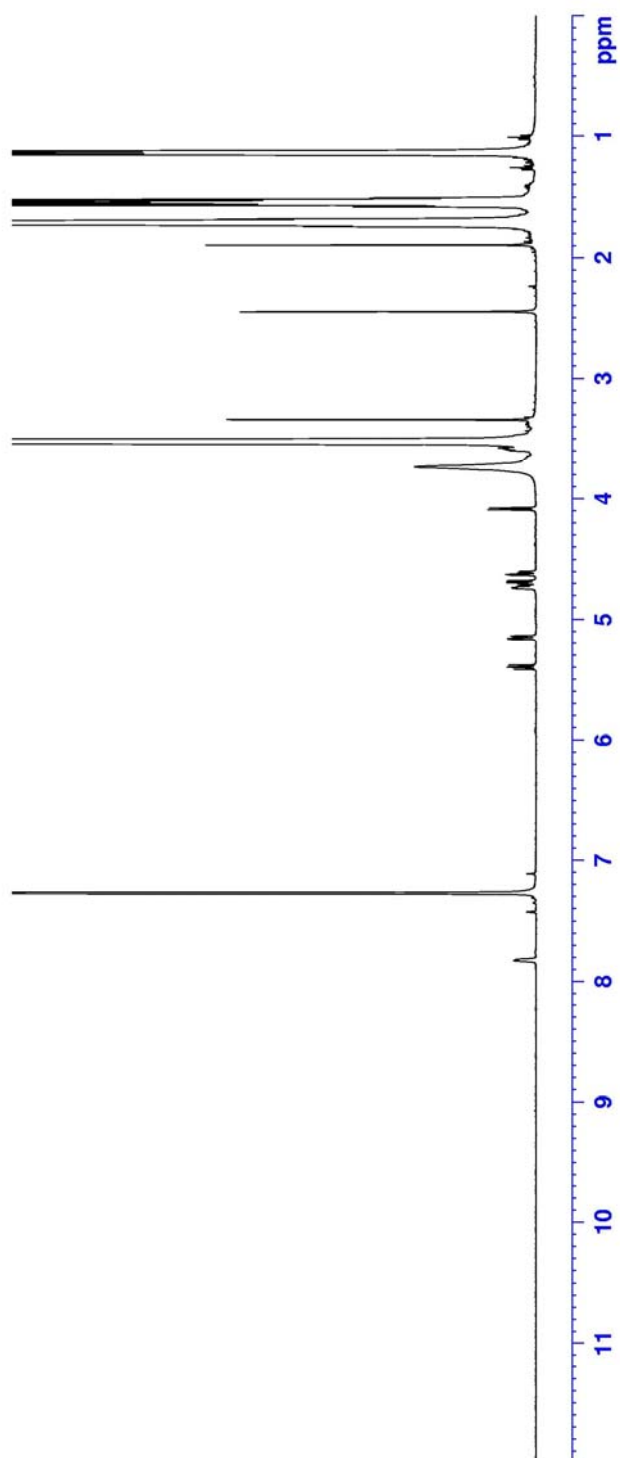

$^1\text{H}$ -H COSY of **6** with TBACl

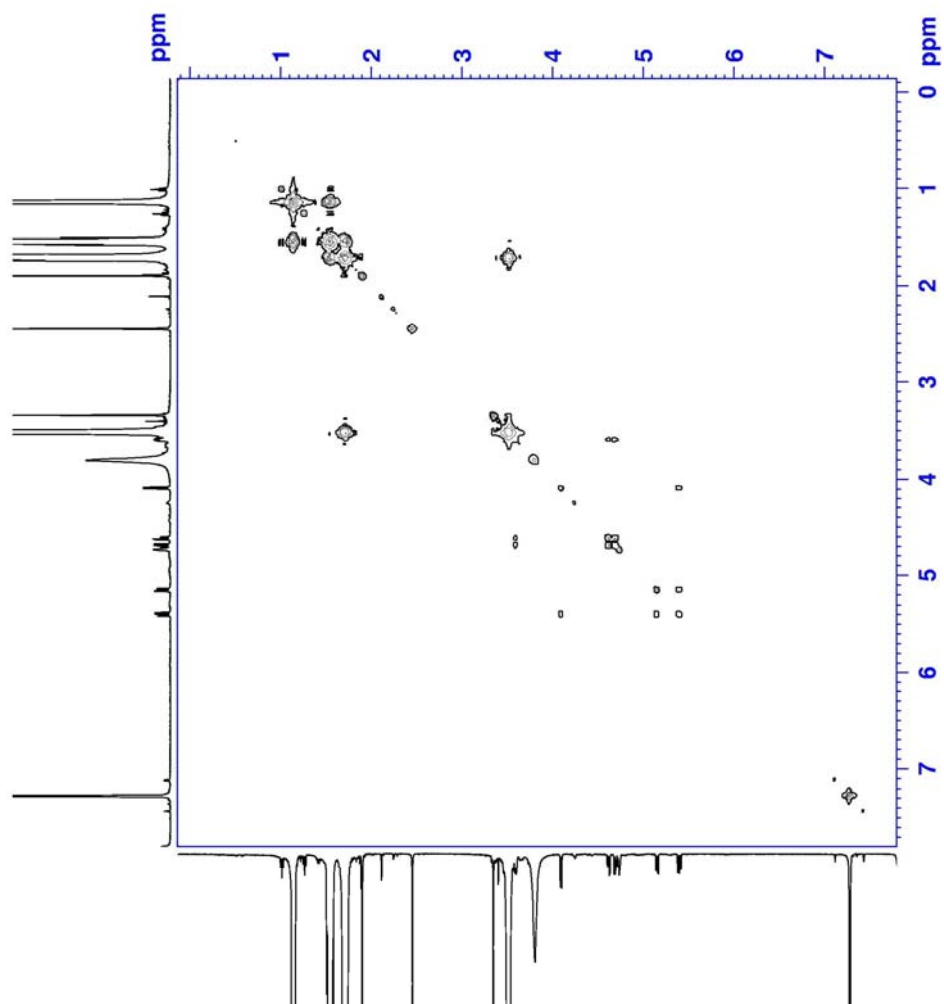

$^1\text{H}$ -NMR of **6** with TBABr

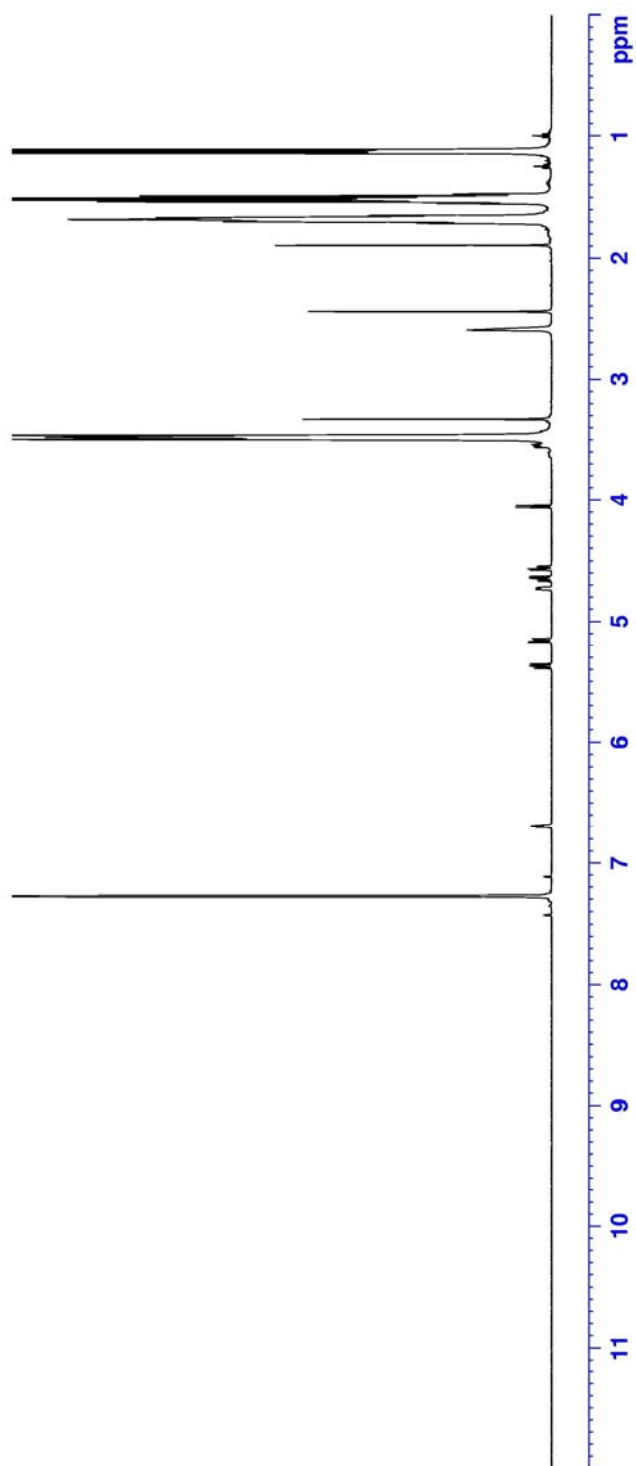

$^1\text{H}$ -H COSY of **6** with TBABr

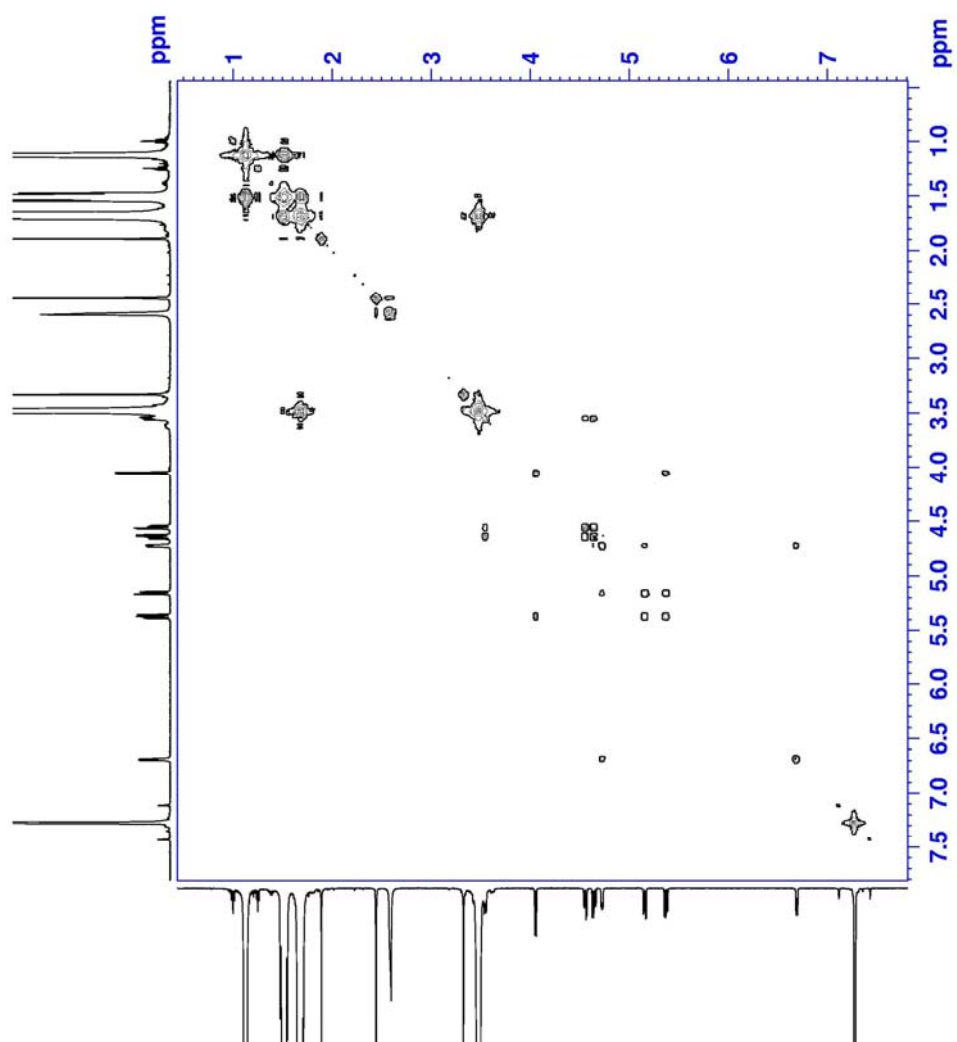

$^1\text{H}$ -NMR of **6** with TBASCN

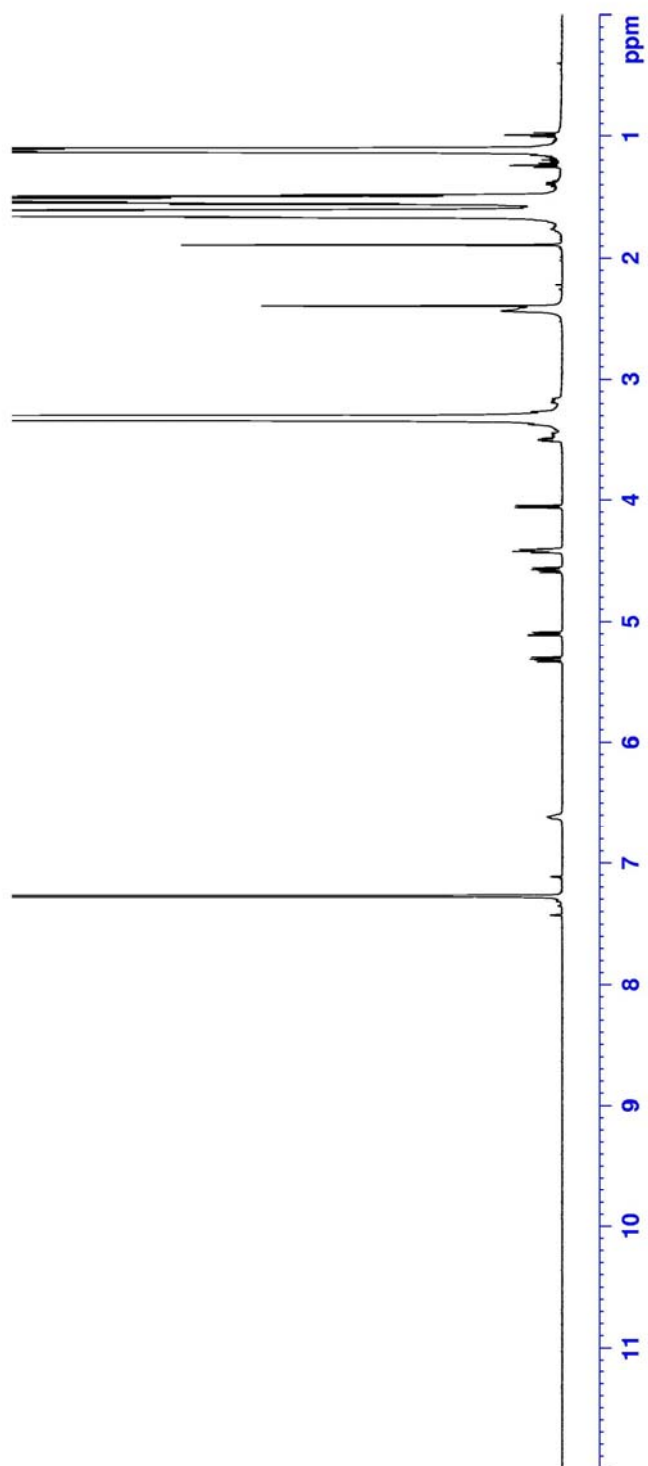

$^1\text{H}$ -H COSY of **6** with TBASCN

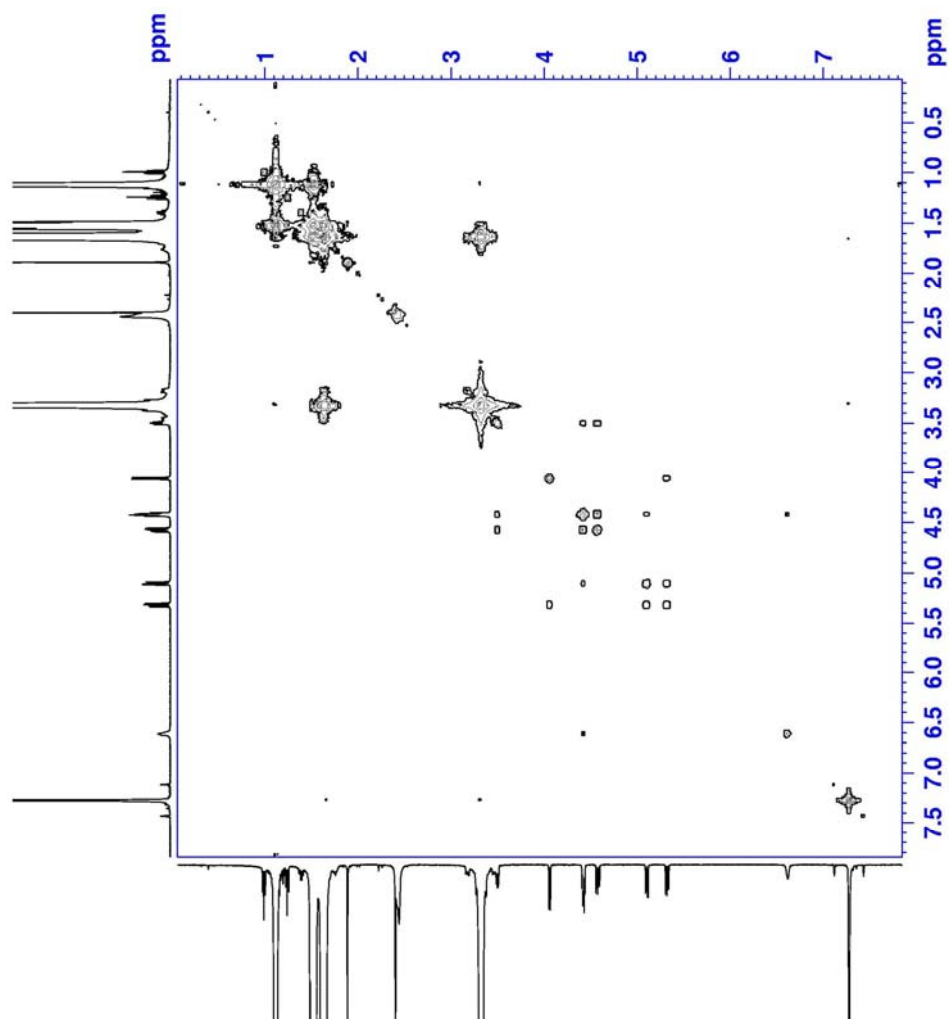

Supplement: b717301f.pdf [file b717301f.pdf]
